# Supplementary material for: Ipragliflozin Improves Hepatic Steatosis in Obese Mice and Liver Dysfunction in Type 2 Diabetic Patients Irrespective of Body Weight Reduction
Source: PubMed Central journal article supplement (PMC4792392; doi:10.1371/journal.pone.0151511), 2016-03-15
Supplement: pone.0151511.s005.pdf [file pone.0151511.s005.pdf]

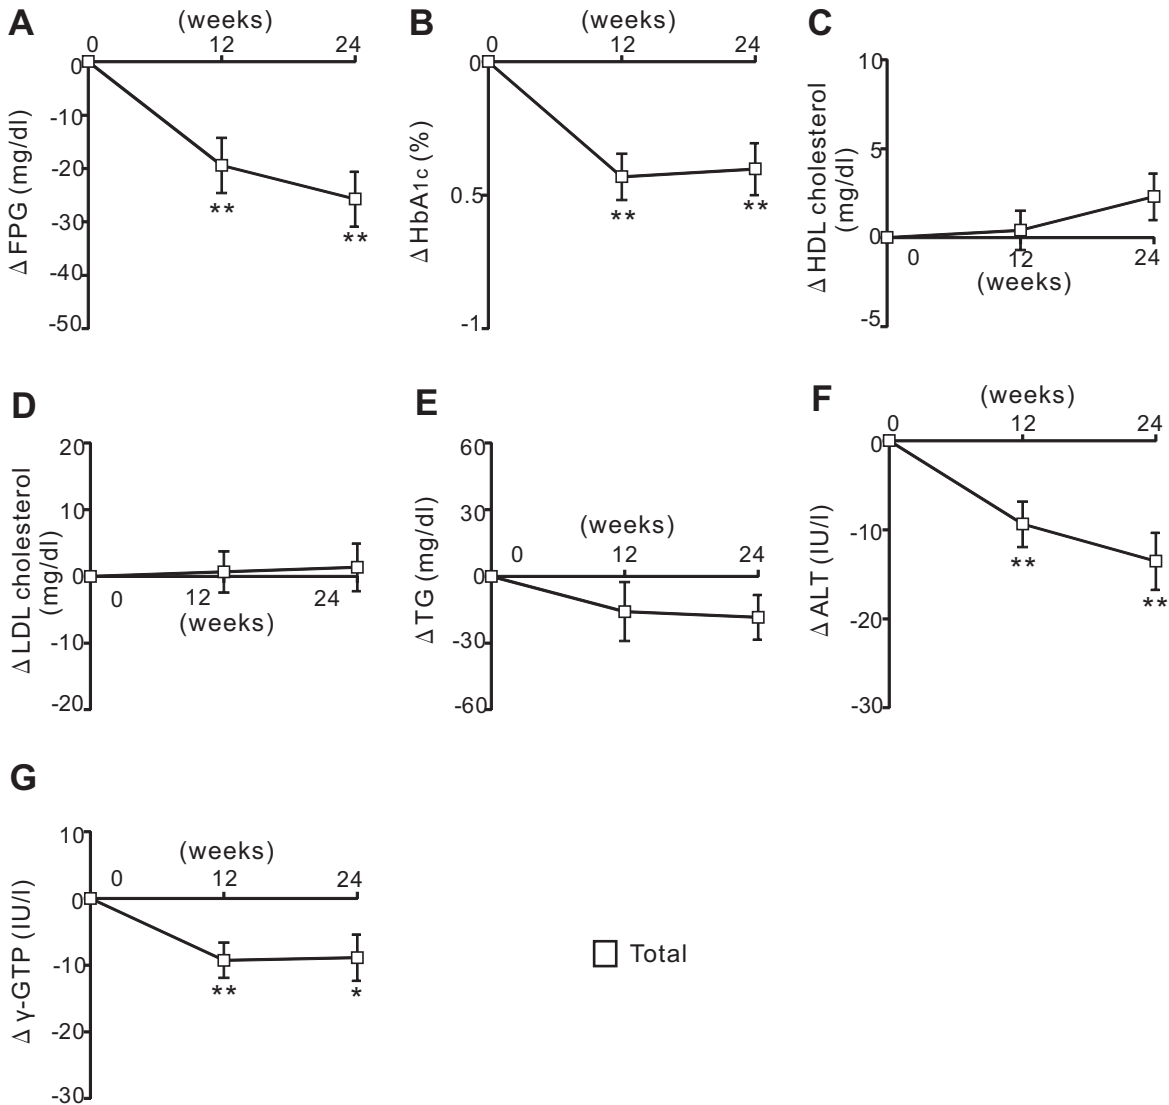

Supplemental Figure 5
