# Supplementary material for: Ipragliflozin Improves Hepatic Steatosis in Obese Mice and Liver Dysfunction in Type 2 Diabetic Patients Irrespective of Body Weight Reduction
Source: PubMed Central journal article supplement (PMC4792392; doi:10.1371/journal.pone.0151511), 2016-03-15
Supplement: pone.0151511.s008.pdf [file pone.0151511.s008.pdf]

1 **S1 Table. List of primers**

---

|                |    |                             |
|----------------|----|-----------------------------|
| <i>36b4</i>    | Fw | GGCCCTGCACTCTCGCTTTC        |
|                | Rv | TGCCAGGACGCGCTTGT           |
| <i>Srebp1c</i> | Fw | CGGAAGCTGTCGGGGTAG          |
|                | Rv | GTTGTTGATGAGCTGGAGCA        |
| <i>Fasn</i>    | Fw | CCTGGATAGCATTCCGAACCT       |
|                | Rv | AGCACATCTCGAAGGCTACACA      |
| <i>Acc1</i>    | Fw | TGAGATTGGCATGGTAGCCTG       |
|                | Rv | CTCGGCCATCTGGATATTCAG       |
| <i>Scd1</i>    | Fw | ACGCCGACCCTCACAATTC         |
|                | Rv | CAGTTTTCCGCCCTTCTCTTT       |
| <i>Acox</i>    | Fw | GCCTTTGTTGTCCCTATCCGT       |
|                | Rv | CGATATCCCCAACAGTGATGC       |
| <i>Cpt1a</i>   | Fw | CCTGCATTCCCTCCCATTG         |
|                | Rv | TGCCCATGTCCTTGTAATGTG       |
| <i>G6pc</i>    | Fw | CACCTGTGAGACCGGACCA         |
|                | Rv | GACCATAACATAGTATACACCTGCTGC |
| <i>Pck1</i>    | Fw | CCACAGCTGCTGCAGAACA         |
|                | Rv | GAAGGGTCGCATGGCAAA          |
| <i>F4/80</i>   | Fw | CTTTGGCTATGGGCTTCCAGTC      |
|                | Rv | GCAAGGAGGACAGAGTTTATCGTG    |
| <i>Cd11c</i>   | Fw | GCCATTGAGGGCACAGAGA         |
|                | Rv | GAAGCCCTCCTGGGACATCT        |
| <i>Cd206</i>   | Fw | CGGTGAACCAAATAATTACCAAAAT   |
|                | Rv | GTGGAGCAGGTGTGGGCT          |

|               |    |                         |
|---------------|----|-------------------------|
| <i>Tnf</i>    | Fw | ACCCTCACACTCAGATCATCTTC |
|               | Rv | TGGTGGTTTGCTACGACGT     |
| <i>Il10</i>   | Fw | GCGCTGTCATCGATTTCTCC    |
|               | Rv | CACCTGCTCCACTGCCTTG     |
| <i>Adipoq</i> | Fw | ATGGCAGAGATGGCACTCCT    |
|               | Rv | CCTTCAGCTCCTGTCATTCCA   |

---
