# Supplementary material for: Ipragliflozin Improves Hepatic Steatosis in Obese Mice and Liver Dysfunction in Type 2 Diabetic Patients Irrespective of Body Weight Reduction
Source: PubMed Central journal article supplement (PMC4792392; doi:10.1371/journal.pone.0151511), 2016-03-15
Supplement: pone.0151511.s009.pdf [file pone.0151511.s009.pdf]

1 **S2 Table. Baseline characteristics of T2DM patients with hepatic steatosis**

|                             |              |
|-----------------------------|--------------|
| <i>n</i> (Male/Female)      | 25 (11/14)   |
| Age (year)                  | 57.1 ± 2.6   |
| Duration of diabetes (year) | 8.8 ± 1.5    |
| Body weight (kg)            | 74.7 ± 2.8   |
| BMI (kg/m <sup>2</sup> )    | 28.1 ± 0.9   |
| Waist circumference (cm)    | 97.4 ± 1.9   |
| SBP (mmHg)                  | 133.9 ± 2.9  |
| DBP (mmHg)                  | 79.4 ± 1.6   |
| FPG (mg/dl)                 | 150.6 ± 9.4  |
| HbA <sub>1c</sub> (%)       | 7.62 ± 0.20  |
| ALT (IU/l)                  | 41.0 ± 5.7   |
| γ-GTP (IU/l)                | 55.9 ± 9.5   |
| HDL cholesterol (mg/dl)     | 50.4 ± 2.3   |
| LDL cholesterol (mg/dl)     | 115.0 ± 4.7  |
| TG (mg/dl)                  | 159.4 ± 13.9 |
| Medications                 |              |
| Metformin (%)               | 76.0         |
| Thiazolidinedione (%)       | 4.0          |
| Sulfonylurea (%)            | 28.0         |
| DPP-4 inhibitor (%)         | 84.0         |
| α-glucosidase inhibitor (%) | 20.0         |
| Insulin (%)                 | 12.0         |
| Lipid-lowering drugs (%)    | 68.0         |

2 BMI, body mass index; SBP, systolic blood pressure; DBP, diastolic blood pressure; FPG, fasting plasma  
 3 glucose; HbA<sub>1c</sub>, hemoglobin A<sub>1c</sub>; ALT, alanine aminotransferase; γ-GTP, γ-glutamyl transpeptidase; HDL,

- 1 high density lipoprotein; LDL, low density lipoprotein; TG, triglyceride; DPP-4, dipeptidyl peptidase-4.
- 2 Data are mean  $\pm$  SEM.
